# Supplementary material
Source: PubMed Central journal article supplement (PMC3934761)
Supplement: NIHMS548936-supplement-supplementary_data.pdf [file NIHMS548936-supplement-supplementary_data.pdf]

## Supporting Information

### Enhanced Electron-Transfer Reactivity of Nonheme Manganese(IV)-Oxo Complexes by Binding Scandium Ions

Heejung Yoon,<sup>†,‡</sup> Yong-Min Lee,<sup>‡</sup> Xiujuan Wu,<sup>‡</sup> Kyung-Bin Cho,<sup>‡</sup> Ritimukta Sarangi,<sup>§</sup>  
Wonwoo Nam,<sup>\*,‡</sup> and Shunichi Fukuzumi<sup>\*,†,‡</sup>

<sup>†</sup>*Department of Material and Life Science, Graduate School of Engineering, ALCA, Japan  
Science and Technology Agency (JST), Osaka University, Suita, Osaka 565-0871, Japan*

<sup>‡</sup>*Department of Bioinspired Science, Ewha Womans University, Seoul 120-750, Korea*

<sup>§</sup>*Stanford Synchrotron Radiation Lightsource, SLAC National Accelerator Laboratory, Menlo  
Park, California 94025, United States*

E-mail: fukuzumi@chem.eng.osaka-u.ac.jp, wwnam@ewha.ac.kr

Full reference for Gaussian 09:

Frisch, M. J.; Trucks, G. W.; Schlegel, H. B.; Scuseria, G. E.; Robb, M. A.; Cheeseman, J. R.; Scalmani, G.; Barone, V.; Mennucci, B.; Petersson, G. A.; Nakatsuji, H.; Caricato, M.; Li, X.; Hratchian, H. P.; Izmaylov, A. F.; Bloino, J.; Zheng, G.; Sonnenberg, J. L.; Hada, M.; Ehara, M.; Toyota, K.; Fukuda, R.; Hasegawa, J.; Ishida, M.; Nakajima, T.; Honda, Y.; Kitao, O.; Nakai, H.; Vreven, T.; Montgomery, J. A.; Peralta, J. E.; Ogliaro, F.; Bearpark, M.; Heyd, J. J.; Brothers, E.; Kudin, K. N.; Staroverov, V. N.; Kobayashi, R.; Normand, J.; Raghavachari, K.; Rendell, A.; Burant, J. C.; Iyengar, S. S.; Tomasi, J.; Cossi, M.; Rega, N.; Millam, J. M.; Klene, M.; Knox, J. E.; Cross, J. B.; Bakken, V.; Adamo, C.; Jaramillo, J.; Gomperts, R.; Stratmann, R. E.; Yazyev, O.; Austin, A. J.; Cammi, R.; Pomelli, C.; Ochterski, J. W.; Martin, R. L.; Morokuma, K.; Zakrzewski, V. G.; Voth, G. A.; Salvador, P.; Dannenberg, J. J.; Dapprich, S.; Daniels, A. D.; Farkas, Ö.; Foresman, J. B.; Ortiz, J. V.; Cioslowski, J.; Fox, D. J. *Gaussian 09, Revision B.01*, Gaussian Inc.: Wallingford CT, 2009.

## Experimental Section for EXAFS Measurements

### X-ray Absorption Spectroscopy

The Mn K-edge X-ray absorption spectra of **1**, [(Bn-TPEN)Mn<sup>IV</sup>(O)]<sup>2+</sup>-(Sc<sup>3+</sup>)<sub>1</sub>, [herein called Mn<sup>IV</sup>(O)-(Sc<sup>3+</sup>)<sub>1</sub>] and [(Bn-TPEN)Mn<sup>IV</sup>(O)]<sup>2+</sup>-(Sc<sup>3+</sup>)<sub>2</sub>, [herein called Mn<sup>IV</sup>(O)-(Sc<sup>3+</sup>)<sub>2</sub>] were measured at the Stanford Synchrotron Radiation Lightsource (SSRL) on the unfocussed 20-pole 2 T wiggler side-station beam line 7-3 under standard ring conditions of 3 GeV and ~500 mA. A Si(220) double crystal monochromator was used for energy selection. A Rh-coated harmonic rejection mirror was used on beam line 7-3 to reject components of higher harmonics. The monochromator was further detuned by 70% to eliminate higher harmonic and to reduce beam damage on samples. The solution samples for Mn<sup>IV</sup>(O)-(Sc<sup>3+</sup>)<sub>1</sub> and Mn<sup>IV</sup>(O)-(Sc<sup>3+</sup>)<sub>2</sub> (~120  $\mu$ L) were transferred into 2 mm delrin XAS cells with 70  $\mu$ m Kapton tape windows under synthesis conditions and were immediately frozen after preparation and stored under liquid N<sub>2</sub>. During data collection, samples were maintained at a constant temperature of ~10 - 15 K using an Oxford Instruments CF 1208 liquid helium cryostat. Data were measured to  $k = 12 \text{ \AA}^{-1}$  (fluorescence mode) using a Canberra Ge 30-element array detector. Internal energy calibration was accomplished by simultaneous measurement of the absorption of a Mn-foil placed between two ionization chambers situated after the sample. The first inflection point of the foil spectrum was fixed at 6539.0 eV. Data presented here are 32-scan average spectra for Mn<sup>IV</sup>(O)-(Sc<sup>3+</sup>)<sub>1</sub> and Mn<sup>IV</sup>(O)-(Sc<sup>3+</sup>)<sub>2</sub>. Data were processed by fitting a second-order polynomial to the pre-edge region and subtracting this from the entire spectrum as background. A four-region spline of orders 2, 3, 3 and 3 was used to model the smoothly decaying post-edge region. The data were normalized by subtracting the cubic spline and assigning the edge jump to 1.0 at 6555 eV using the Pyspline program.<sup>S1</sup> Data were then renormalized in Kaleidagraph for comparison and quantitation purposes.

Theoretical EXAFS signals  $\chi(k)$  were calculated by using FEFF (macintosh version 8.4).<sup>S2-S4</sup> Starting structural models for Mn<sup>IV</sup>(O)-(Sc<sup>3+</sup>)<sub>1</sub> and Mn<sup>IV</sup>(O)-(Sc<sup>3+</sup>)<sub>2</sub> were generated by modifying the crystal structure of [(Bn-TPEN)Mn<sup>II</sup>(CF<sub>3</sub>SO<sub>3</sub>)]<sup>+</sup> in Avogadro.<sup>S5</sup> The input structure was improved based on preliminary EXAFS fit parameters to generate more accurate theoretical EXAFS signals. Data fitting was performed in EXAFSPAK.<sup>S6</sup> The structural parameters varied during the fitting process were the bond distance (R) and the bond variance  $\sigma^2$ , which is related to the Debye-Waller factor resulting from thermal motion, and static disorder of the absorbing and scattering atoms. The non-structural parameter  $E_0$  (the energy at which  $k = 0$ ) was also allowed to vary but was restricted to a common value for

every component in a given fit. Coordination numbers was systematically varied in the course of the fit but were fixed within a given fit.

## Results and Analysis

The  $k^3$  weighted Mn K-edge EXAFS data for **1**,  $\text{Mn}^{\text{IV}}(\text{O})-(\text{Sc}^{3+})_1$  and  $\text{Mn}^{\text{IV}}(\text{O})-(\text{Sc}^{3+})_2$  along with their non-phase shift corrected Fourier transforms (FT) ( $k = 1 - 12 \text{ \AA}^{-1}$ ) are shown in Figure S3. The EXAFS data for **1** have been previously reported,<sup>S7</sup> but were re-measured under the same experimental conditions for direct comparison to  $\text{Mn}^{\text{IV}}(\text{O})-(\text{Sc}^{3+})_1$  and  $\text{Mn}^{\text{IV}}(\text{O})-(\text{Sc}^{3+})_2$ . The comparison shows that on going from **1** to  $\text{Mn}^{\text{IV}}(\text{O})-(\text{Sc}^{3+})_1$  to  $\text{Mn}^{\text{IV}}(\text{O})-(\text{Sc}^{3+})_2$ , the first shell intensity progressively diminishes. In addition, the FT data for  $\text{Mn}^{\text{IV}}(\text{O})-(\text{Sc}^{3+})_1$  shows a modest increase in intensity at  $R' \sim 3 \text{ \AA}$  relative to  $[(\text{Bn-TPEN})\text{Mn}^{\text{IV}}(\text{O})]^{2+}$ , while a much more intense feature is observed in  $\text{Mn}^{\text{IV}}(\text{O})-(\text{Sc}^{3+})_2$  at  $R' \sim 3 \text{ \AA}$ .

FEFF fits to the EXAFS data were performed to quantitatively understand the differences visually observed in the FT data. The fits to  $\text{Mn}^{\text{IV}}(\text{O})-(\text{Sc}^{3+})_1$  and  $\text{Mn}^{\text{IV}}(\text{O})-(\text{Sc}^{3+})_2$  indicate that the two species have very similar first shells (see Table S1). Both are consistent with a distorted six-coordinate first shell with one short Mn-O (1.74  $\text{\AA}$ ), four Mn-N ( $\sim 2.07 \text{ \AA}$ ) and a longer Mn-N (2.36  $\text{\AA}$  in  $\text{Mn}^{\text{IV}}(\text{O})-(\text{Sc}^{3+})_1$  and 2.27  $\text{\AA}$  in  $\text{Mn}^{\text{IV}}(\text{O})-(\text{Sc}^{3+})_2$ ) distance. This difference in the longer Mn-N bond is likely due to an increase in error associated with a strong correlation of the weaker Mn-N parameters with those of the short Mn-N component. The second and third EXAFS shells were fit with single and multiple scattering components from the Bn-TPEN ligand system. The intense peak at  $\sim 3 \text{ \AA}$  observed for  $\text{Mn}^{\text{IV}}(\text{O})-(\text{Sc}^{3+})_2$  was fit with a Mn-Sc interaction at  $\sim 3.44 \text{ \AA}$ . Both single (Mn-Sc at 3.44  $\text{\AA}$ ) and multiple scattering (Mn-O-Sc at 3.52  $\text{\AA}$ ) components were required to obtain a good fit. In  $\text{Mn}^{\text{IV}}(\text{O})-(\text{Sc}^{3+})_1$ , this feature is less obvious and the increase in goodness of fit upon the inclusion of the corresponding Mn-Sc parameters was small. The single and multiple scattering components optimized to 3.45 and 3.59  $\text{\AA}$ , respectively. The larger difference between the single and multiple scattering components in  $\text{Mn}^{\text{IV}}(\text{O})-(\text{Sc}^{3+})_1$  (0.14  $\text{\AA}$ ) compared to  $\text{Mn}^{\text{IV}}(\text{O})-(\text{Sc}^{3+})_2$  (0.08  $\text{\AA}$ ), indicates that the Mn-O-Sc angle is steeper in  $\text{Mn}^{\text{IV}}(\text{O})-(\text{Sc}^{3+})_1$  relative to  $\text{Mn}^{\text{IV}}(\text{O})-(\text{Sc}^{3+})_2$ . This is consistent with the weaker intensity at 3  $\text{\AA}$ , since intense multiple scattering components would only contribute strongly if the Mn-O-Sc were close to linearity.

The EXAFS fit results show that upon  $\text{Sc}^{3+}$  binding, the Mn=O distance increases from 1.69 in **1** to 1.74  $\text{\AA}$  in both  $\text{Mn}^{\text{IV}}(\text{O})-(\text{Sc}^{3+})_1$  and  $\text{Mn}^{\text{IV}}(\text{O})-(\text{Sc}^{3+})_2$ . This is in excellent

agreement with DFT results, which show that the Mn=O in **1**, Mn<sup>IV</sup>(O)-(Sc<sup>3+</sup>)<sub>1</sub> and Mn<sup>IV</sup>(O)-(Sc<sup>3+</sup>)<sub>2</sub> are 1.68 Å, 1.75 Å and 1.75 Å, respectively. The Mn-Sc distance from the DFT is somewhat longer than that predicted by the EXAFS results for both Mn<sup>IV</sup>(O)-(Sc<sup>3+</sup>)<sub>1</sub> and Mn<sup>IV</sup>(O)-(Sc<sup>3+</sup>)<sub>2</sub> (by ~0.2 Å). Similar discrepancy has been observed in previous studies, where DFT calculated metal-metal distances was predicted to be longer than the EXAFS distances.<sup>S8,S9</sup> This difference is likely attributed to a combination of higher EXAFS error at longer distances (~ 0.1 Å) and shortcomings in DFT to accurately predict the metal-metal distance. In one study, this difference has been attributed to a flat potential energy surface along the metal-metal distance coordinate.<sup>S9</sup> Interestingly, the Mn-O-Sc angle in Mn<sup>IV</sup>(O)-(Sc<sup>3+</sup>)<sub>1</sub> is 162.9°, while that in Mn<sup>IV</sup>(O)-(Sc<sup>3+</sup>)<sub>2</sub> is 170.6°. The steeper calculated Mn-O-Sc angle in Mn<sup>IV</sup>(O)-(Sc<sup>3+</sup>)<sub>1</sub> is consistent with the EXAFS results and supports the theory that the non-linear Mn-O-Sc in Mn<sup>IV</sup>(O)-(Sc<sup>3+</sup>)<sub>1</sub> results in a weaker EXAFS signal at ~ 3 Å.

## References

- (S1) Tenderholt, A.; Hedman, B.; Hodgson, K. O. *PySpline: A Modern, Cross-Platform Program for the Processing of Raw Averaged XAS Edge and EXAFS Data; X-ray Absorption Fine Structure - XAFS13*, **2007**, 882, 105-107.
- (S2) Zabinsky, S. I.; Rehr, J. J.; Ankudinov, A.; Albers, R. C.; Eller, M. J. *Phys. Rev. B: Condens. Matter* **1995**, 52, 2995-3009.
- (S3) Mustre de Leon, J.; Rehr, J. J.; Zabinsky, S. I.; Albers, R. C. *Phys. Rev. B: Condens. Matter* **1991**, 44, 4146-4156.
- (S4) Rehr, J. J.; Mustre de Leon, J.; Zabinsky, S. I.; Albers, R. C. *J. Am. Chem. Soc.* **1991**, 113, 5135-5140.
- (S5) Avogadro: an open-source molecular builder and visualization tool. Version 1.1.0. <http://avogadro.openmolecules.net/>.
- (S6) George, G. N. *EXAFSPAK and EDG-FIT*, Stanford Synchrotron Radiation Laboratory, Stanford Linear Accelerator Center, Stanford, CA, 2000.
- (S7) Wu, X.; Seo, M. S.; Davis, K. M.; Lee, Y. M.; Chen, J.; Cho, K. B.; Pushkar, Y. N.; Nam, W. *J. Am. Chem. Soc.* **2011**, 133, 20088-20091.
- (S8) Chen, J.; Lee, Y. M.; Davis, K. M.; Wu, X.; Seo, M. S.; Cho, K. B.; Yoon, H.; Park, Y. J.; Fukuzumi, S.; Pushkar, Y. N.; Nam, W. *J. Am. Chem. Soc.* **2013**, 135, 6388-6391.
- (S9) Del Rio, D.; Sarangi, R.; Chufan, E. E.; Karlin, K. D.; Hedman, B.; Hodgson, K. O.; Solomon, E. I. *J. Am. Chem. Soc.* **2005**, 127, 11969-11978.

**Table S1.** EXAFS Least Squares Fitting Results

| Complex                                               | Coordination/Path      | R(Å) <sup>a</sup> | σ <sup>2</sup> (Å <sup>2</sup> ) <sup>b</sup> | E <sub>0</sub> (eV) | F <sup>c</sup> |
|-------------------------------------------------------|------------------------|-------------------|-----------------------------------------------|---------------------|----------------|
| Mn <sup>IV</sup> (O)-(Sc <sup>3+</sup> ) <sub>1</sub> | 1 Mn-O                 | 1.74              | 640                                           | -3.26               | 0.42           |
|                                                       | 4 Mn-N                 | 2.07              | 575                                           |                     |                |
|                                                       | 1 Mn-N                 | 2.36              | 95                                            |                     |                |
|                                                       | 6 Mn-C                 | 2.94              | 334                                           |                     |                |
|                                                       | 12 Mn-C-N              | 3.32              | /334                                          |                     |                |
|                                                       | 1 Mn-Sc <sup>d</sup>   | 3.45              | 160                                           |                     |                |
|                                                       | 2 Mn-O-Sc <sup>d</sup> | 3.59              | 461                                           |                     |                |
|                                                       | 4 Mn-C-N               | 4.37              | 597                                           |                     |                |
| Mn <sup>IV</sup> (O)-(Sc <sup>3+</sup> ) <sub>2</sub> | 1 Mn-O                 | 1.74              | 841                                           | -3.78               | 0.36           |
|                                                       | 4 Mn-N                 | 2.08              | 838                                           |                     |                |
|                                                       | 1 Mn-N                 | 2.27              | 358                                           |                     |                |
|                                                       | 6 Mn-C                 | 2.91              | 410                                           |                     |                |
|                                                       | 12 Mn-C-N              | 3.35              | /410                                          |                     |                |
|                                                       | 1 Mn-Sc <sup>d</sup>   | 3.44              | 140                                           |                     |                |
|                                                       | 2 Mn-O-Sc <sup>d</sup> | 3.52              | 139                                           |                     |                |
|                                                       | 4 Mn-C-N               | 4.26              | 619                                           |                     |                |

<sup>a</sup>The estimated standard deviations for the distances are in the order of ± 0.02 Å. <sup>b</sup>The σ<sup>2</sup> values are multiplied by 10<sup>5</sup>. <sup>c</sup>Error is given by Σ[(χ<sub>obsd</sub> - χ<sub>calcd</sub>)<sup>2</sup> k<sup>6</sup>]/Σ[(χ<sub>obsd</sub>)<sup>2</sup> k<sup>6</sup>]. <sup>d</sup>/ indicates the σ<sup>2</sup> value for the path is linked to the preceding path. The S<sub>0</sub><sup>2</sup> factor was set at 0.95.

**Table S2.** Selected Geometries in Å

| species                                                        | Mn-O | MnO-Sc <sub>A</sub> | MnO-Sc <sub>B</sub> | Sc <sub>A</sub> -Sc <sub>B</sub> | Mn-Sc <sub>A</sub> | Mn-Sc <sub>B</sub> |
|----------------------------------------------------------------|------|---------------------|---------------------|----------------------------------|--------------------|--------------------|
| [(Bn-TPEN)Mn <sup>IV</sup> O] <sup>a</sup>                     | 1.68 | ---                 | ---                 | ---                              | ---                | ---                |
| [(Bn-TPEN)Mn <sup>IV</sup> O]-(Sc <sup>3+</sup> ) <sub>1</sub> | 1.75 | 1.94                | ---                 | ---                              | 3.65               | ---                |
| [(Bn-TPEN)Mn <sup>IV</sup> O]-(Sc <sup>3+</sup> ) <sub>2</sub> | 1.75 | 1.94                | 6.11                | 5.35                             | 3.68               | 7.09               |

<sup>a</sup> Values taken from ref 41a in the text.

**Table S3.** Mulliken Spin Density Distribution

| species                                                        | Mn   | O    | Sc <sub>A</sub> | Sc <sub>B</sub> | 5 x N | rest of Bn-TPEN | 6 x OTf           |
|----------------------------------------------------------------|------|------|-----------------|-----------------|-------|-----------------|-------------------|
| [(Bn-TPEN)Mn <sup>IV</sup> O] <sup>a</sup>                     | 2.64 | 0.63 | ---             | ---             | -0.15 | 0.02            | ---               |
| [(Bn-TPEN)Mn <sup>IV</sup> O]-(Sc <sup>3+</sup> ) <sub>1</sub> | 3.13 | 0.27 | 0.02            | ---             | -0.50 | 0.06            | 0.02 <sup>b</sup> |
| [(Bn-TPEN)Mn <sup>IV</sup> O]-(Sc <sup>3+</sup> ) <sub>2</sub> | 3.14 | 0.29 | 0.01            | 0.00            | -0.54 | 0.08            | 0.03              |

<sup>a</sup> Values taken from ref 41a in the main text. <sup>b</sup> 3 x OTf.

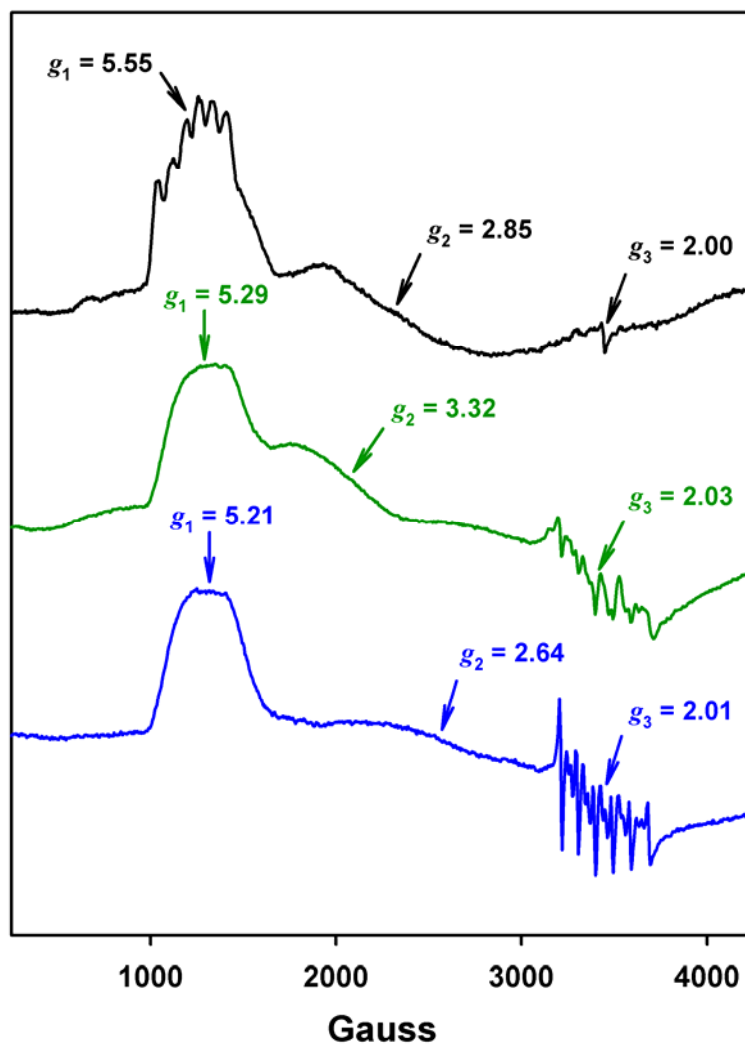

**Figure S1.** X-band CW-EPR spectra of  $[(\text{Bn-TPEN})\text{Mn}^{\text{IV}}(\text{O})]^{2+}$  (1.0 mM, black line),  $[(\text{Bn-TPEN})\text{Mn}^{\text{IV}}(\text{O})]^{2+}-(\text{Sc}^{3+})_1$  (1.0 mM, green line), and  $[(\text{Bn-TPEN})\text{Mn}^{\text{IV}}(\text{O})]^{2+}-(\text{Sc}^{3+})_2$  (1.0 mM, blue line). Spectra were recorded in  $\text{CF}_3\text{CH}_2\text{OH}/\text{CH}_3\text{CN}$  (v/v = 19:1) at 5 K.



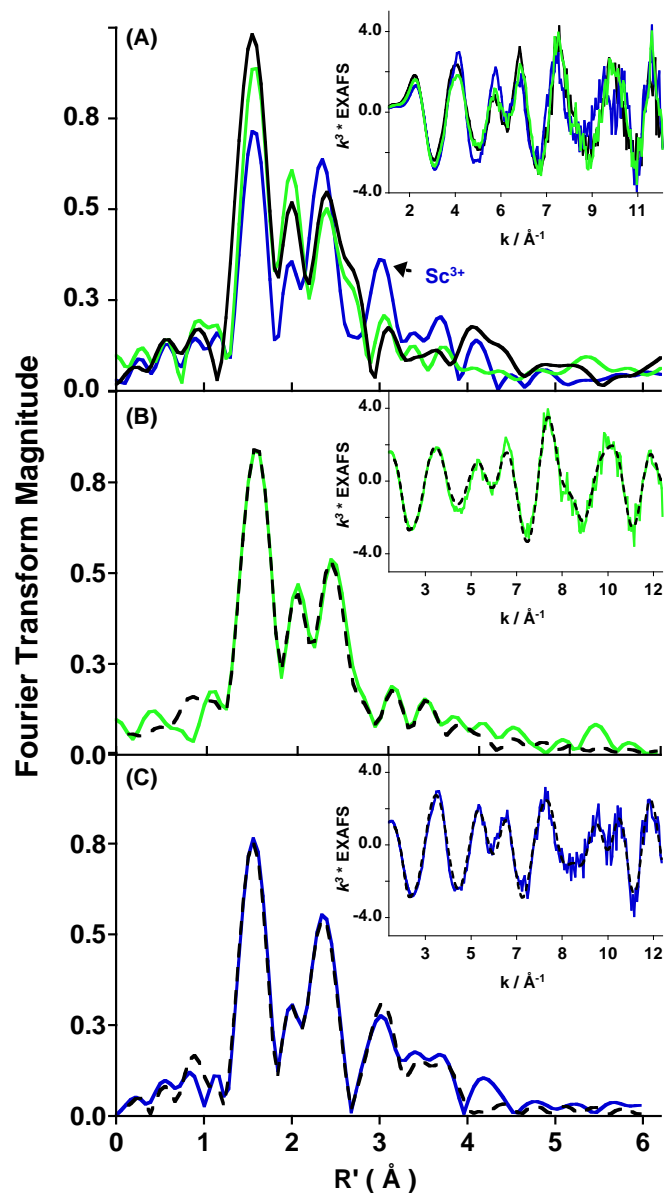

**Figure S2.** (A) A comparison of the non phase-shift corrected Fourier transforms and the corresponding Mn K-edge EXAFS data (inset) for **1** (—), Mn<sup>IV</sup>(O)-(Sc<sup>3+</sup>)<sub>1</sub> (—) and Mn<sup>IV</sup>(O)-(Sc<sup>3+</sup>)<sub>2</sub> (—). FEFF best-fits (- - -) to Mn<sup>IV</sup>(O)-(Sc<sup>3+</sup>)<sub>1</sub> (—) and Mn<sup>IV</sup>(O)-(Sc<sup>3+</sup>)<sub>2</sub> (—) are shown in (B) and (C), respectively. Fits were performed over  $k = 2 - 12 \text{ \AA}^{-1}$  range.

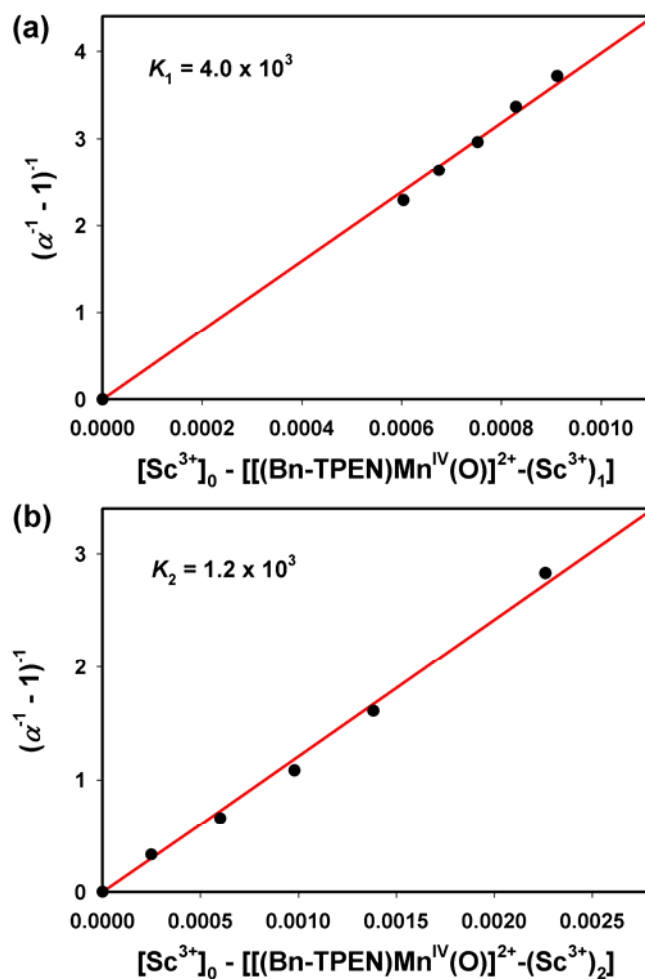

**Figure S3.** (a) Plot of  $(\alpha^{-1} - 1)^{-1}$  vs  $[\text{Sc}^{3+}]_0 - [(\text{BnTPEN})\text{Mn}^{\text{IV}}(\text{O})]^{2+} - (\text{Sc}^{3+})_1$  to determine the first binding constant ( $K_1 = \frac{[(\text{Mn}^{\text{IV}}(\text{O})]^{2+} - (\text{Sc}^{3+})_1]}{[(\text{Mn}^{\text{IV}}(\text{O})]^{2+}][\text{Sc}^{3+}]}$ ) upon addition of  $\text{Sc}^{3+}$  (0.0 – 2.0 mM) into the solution of  $[(\text{BnTPEN})\text{Mn}^{\text{IV}}(\text{O})]^{2+}$  (1.0 mM) in  $\text{CF}_3\text{CH}_2\text{OH}/\text{CH}_3\text{CN}$  (v/v = 1:1) at 298 K;  $\alpha = \frac{[(\text{BnTPEN})\text{Mn}^{\text{IV}}(\text{O})]^{2+} - (\text{Sc}^{3+})_1}{[(\text{BnTPEN})\text{Mn}^{\text{IV}}(\text{O})]^{2+}_0}$ . (b) Plot of  $(\alpha^{-1} - 1)^{-1}$  vs  $[\text{Sc}^{3+}]_0 - [(\text{BnTPEN})\text{Mn}^{\text{IV}}(\text{O})]^{2+} - (\text{Sc}^{3+})_2$  to determine the second binding constant ( $K_2 = \frac{[(\text{Mn}^{\text{IV}}(\text{O})]^{2+} - (\text{Sc}^{3+})_2]}{[(\text{Mn}^{\text{IV}}(\text{O})]^{2+} - (\text{Sc}^{3+})_1][\text{Sc}^{3+}]}$ ) upon addition of  $\text{Sc}^{3+}$  (0.0 – 12 mM) into the solution of  $[(\text{BnTPEN})\text{Mn}^{\text{IV}}(\text{O})]^{2+} - (\text{Sc}^{3+})_1$  (1.0 mM) in  $\text{CF}_3\text{CH}_2\text{OH}/\text{CH}_3\text{CN}$  (v/v = 1:1) at 298 K;  $\alpha = \frac{[(\text{BnTPEN})\text{Mn}^{\text{IV}}(\text{O})]^{2+} - (\text{Sc}^{3+})_2}{[(\text{BnTPEN})\text{Mn}^{\text{IV}}(\text{O})]^{2+} - (\text{Sc}^{3+})_1}_0$ . The expression used for the determination of  $K_1$  and  $K_2$  was derived according to ref 43 in the text.

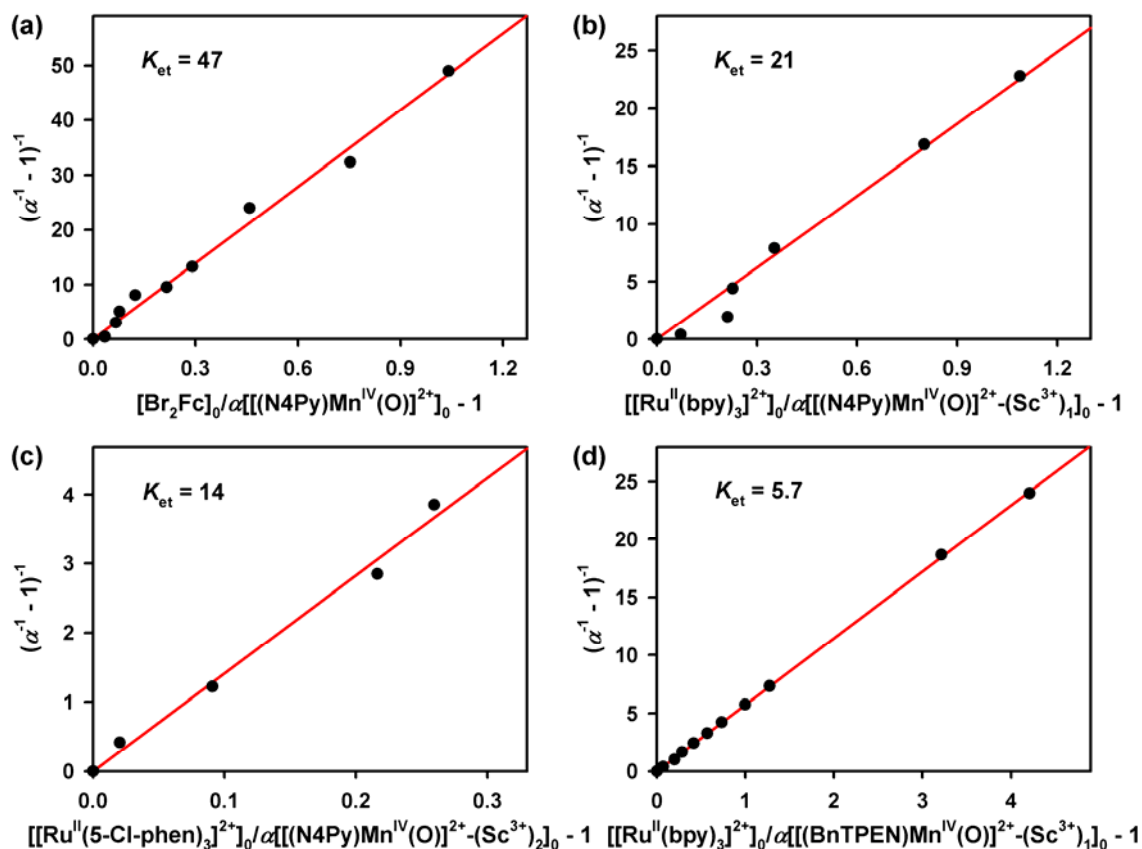

**Figure S4.** (a) Plot of  $(\alpha^{-1} - 1)^{-1}$  vs  $[\text{Br}_2\text{Fc}]_0 / \alpha [[(\text{N4Py})\text{Mn}^{\text{IV}}(\text{O})]^{2+}]_0 - 1$  to determine equilibrium constants ( $K_{et} = [\text{Br}_2\text{Fc}^+][[\text{Mn}^{\text{III}}(\text{O})]^+]/[\text{Br}_2\text{Fc}][[\text{Mn}^{\text{IV}}(\text{O})]^{2+}]$ ) for electron transfer from  $\text{Br}_2\text{Fc}$  to  $[(\text{N4Py})\text{Mn}^{\text{IV}}(\text{O})]^{2+}$  upon addition of  $\text{Br}_2\text{Fc}$  (0.0 – 2.5 mM) into the solution of  $[(\text{N4Py})\text{Mn}^{\text{IV}}(\text{O})]^{2+}$  (0.50 mM) in  $\text{CF}_3\text{CH}_2\text{OH}/\text{CH}_3\text{CN}$  (v/v = 1:1) at 273 K ( $\alpha = [\text{Br}_2\text{Fc}^+]/[[(\text{N4Py})\text{Mn}^{\text{IV}}(\text{O})]^{2+}]_0$ ). The slope of the linear plot corresponds to  $K_{et}$ . The linear correlation can be derived from the electron-transfer equilibrium in eq 1. The same analyses were performed to determine the  $K_{et}$  values for  $(\text{N4Py})\text{Mn}^{\text{IV}}(\text{O})]^{2+} - (\text{Sc}^{3+})_1$  (b),  $[(\text{N4Py})\text{Mn}^{\text{IV}}(\text{O})]^{2+} - (\text{Sc}^{3+})_2$  (c), and  $(\text{Bn-TPEN})\text{Mn}^{\text{IV}}(\text{O})]^{2+} - (\text{Sc}^{3+})_1$  (d).

(b) Plot of  $(\alpha^{-1} - 1)^{-1}$  vs  $[[\text{Ru}^{\text{II}}(\text{bpy})_3]^{2+}]_0 / \alpha [[(\text{N4Py})\text{Mn}^{\text{IV}}(\text{O})]^{2+} - (\text{Sc}^{3+})_1]_0 - 1$  ( $\alpha = [[\text{Ru}^{\text{III}}(\text{bpy})_3]^{3+}]/[[(\text{N4Py})\text{Mn}^{\text{IV}}(\text{O})]^{2+} - (\text{Sc}^{3+})_1]_0$ ).

(c) Plot of  $(\alpha^{-1} - 1)^{-1}$  vs  $[[\text{Ru}^{\text{II}}(5\text{-Cl-phen})_3]^{2+}]_0 / \alpha [[(\text{N4Py})\text{Mn}^{\text{IV}}(\text{O})]^{2+} - (\text{Sc}^{3+})_2]_0 - 1$  ( $\alpha = [[\text{Ru}^{\text{III}}(5\text{-Cl-phen})_3]^{3+}]/[[(\text{N4Py})\text{Mn}^{\text{IV}}(\text{O})]^{2+} - (\text{Sc}^{3+})_2]_0$ ).

(d) Plot of  $(\alpha^{-1} - 1)^{-1}$  vs  $[[\text{Ru}^{\text{II}}(\text{bpy})_3]^{2+}]_0 / \alpha [[(\text{BnTPEN})\text{Mn}^{\text{IV}}(\text{O})]^{2+} - (\text{Sc}^{3+})_1]_0 - 1$  ( $\alpha = [[\text{Ru}^{\text{III}}(\text{bpy})_3]^{3+}]/[[(\text{BnTPEN})\text{Mn}^{\text{IV}}(\text{O})]^{2+} - (\text{Sc}^{3+})_1]_0$ ).

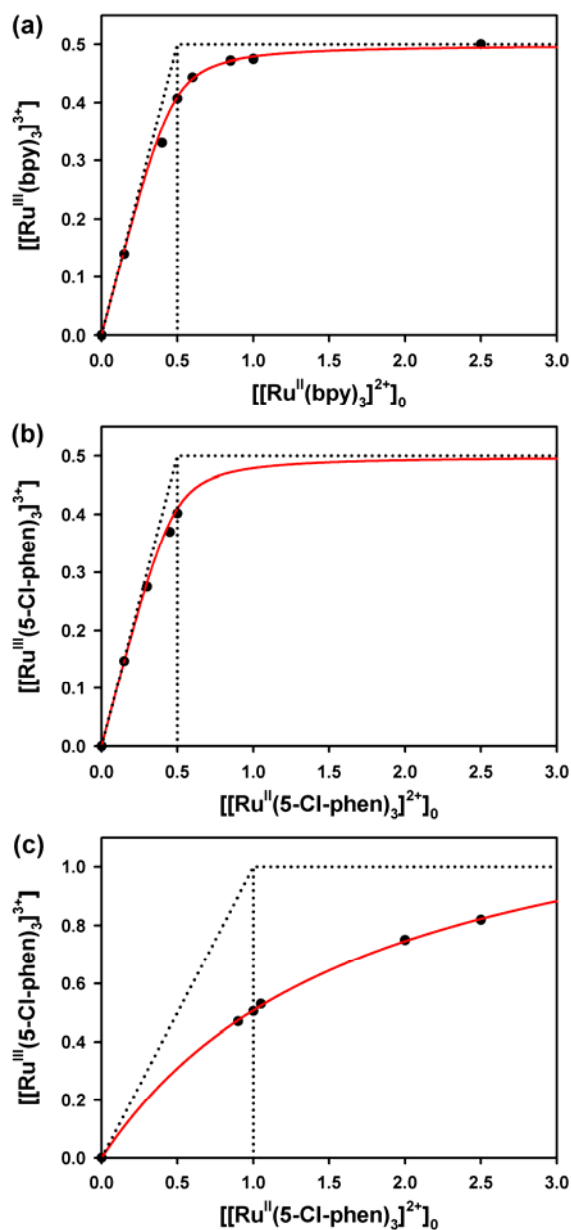

**Figure S5.** (a) Plot of concentration of  $[\text{Ru}^{\text{III}}(\text{bpy})_3]^{3+}$  produced in electron transfer from  $[\text{Ru}^{\text{II}}(\text{bpy})_3]^{2+}$  (1.24 V vs SCE) to  $[(\text{N4Py})\text{Mn}^{\text{IV}}(\text{O})]^{2+}-(\text{Sc}^{3+})_1$  vs initial concentration of  $[\text{Ru}^{\text{II}}(\text{bpy})_3]^{2+}$  in  $\text{CF}_3\text{CH}_2\text{OH}/\text{CH}_3\text{CN}$  (v/v = 1:1) at 273 K. (b) Plot of concentration of  $[\text{Ru}^{\text{III}}(5\text{-Cl-phen})_3]^{3+}$  produced in electron transfer from  $[\text{Ru}^{\text{II}}(5\text{-Cl-phen})_3]^{2+}$  (1.36 V vs SCE) to  $[(\text{N4Py})\text{Mn}^{\text{IV}}(\text{O})]^{2+}-(\text{Sc}^{3+})_2$  vs initial concentration of  $[\text{Ru}^{\text{II}}(5\text{-Cl-phen})_3]^{2+}$  in  $\text{CF}_3\text{CH}_2\text{OH}/\text{CH}_3\text{CN}$  (v/v = 1:1) at 273 K. (c) Plot of concentration of  $[\text{Ru}^{\text{III}}(5\text{-Cl-phen})_3]^{3+}$  produced in electron transfer from  $[\text{Ru}^{\text{II}}(5\text{-Cl-phen})_3]^{2+}$  to  $[(\text{Bn-TPEN})\text{Mn}^{\text{IV}}(\text{O})]^{2+}-(\text{Sc}^{3+})_2$  vs initial concentration of  $[\text{Ru}^{\text{II}}(5\text{-Cl-phen})_3]^{2+}$  in  $\text{CF}_3\text{CH}_2\text{OH}/\text{CH}_3\text{CN}$  (v/v = 1:1) at 273 K.

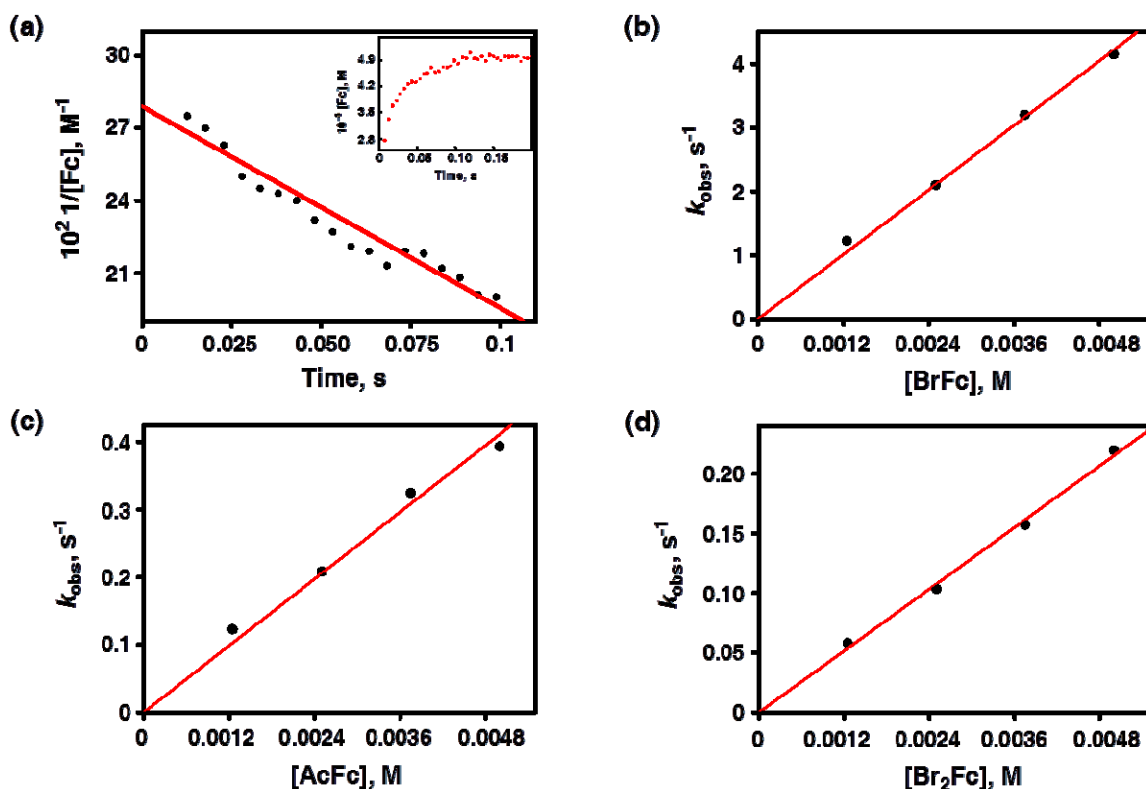

**Figure S6.** (a) Second-order-plot of  $1/[\text{Fc}]$  vs time for electron transfer from ferrocene ( $5.0 \times 10^{-4} \text{ M}$ ) to  $[(\text{N4Py})\text{Mn}^{\text{IV}}(\text{O})]^{2+}$  ( $5.0 \times 10^{-4} \text{ M}$ ). Inset shows time course of the absorbance change monitored at 615 nm due to ferrocenium ion ( $\epsilon_{615} = 400 \text{ M}^{-1} \text{ cm}^{-1}$ ). (b, c, d) Plots of pseudo-first-order rate constant ( $k_{\text{obs}}$ ) vs concentrations of ferrocene derivatives to determine the second-order rate constants of electron transfer from ferrocene derivatives [(b) bromoferrocene (BrFc), (c) acetylferrocene (AcFc), and (d) dibromoferrocene (Br<sub>2</sub>Fc)] to  $[(\text{N4Py})\text{Mn}^{\text{IV}}(\text{O})]^{2+}$  ( $1.25 \times 10^{-4} \text{ M}$ ) in  $\text{CF}_3\text{CH}_2\text{OH}/\text{CH}_3\text{CN}$  (v/v = 1:1) at 273 K.

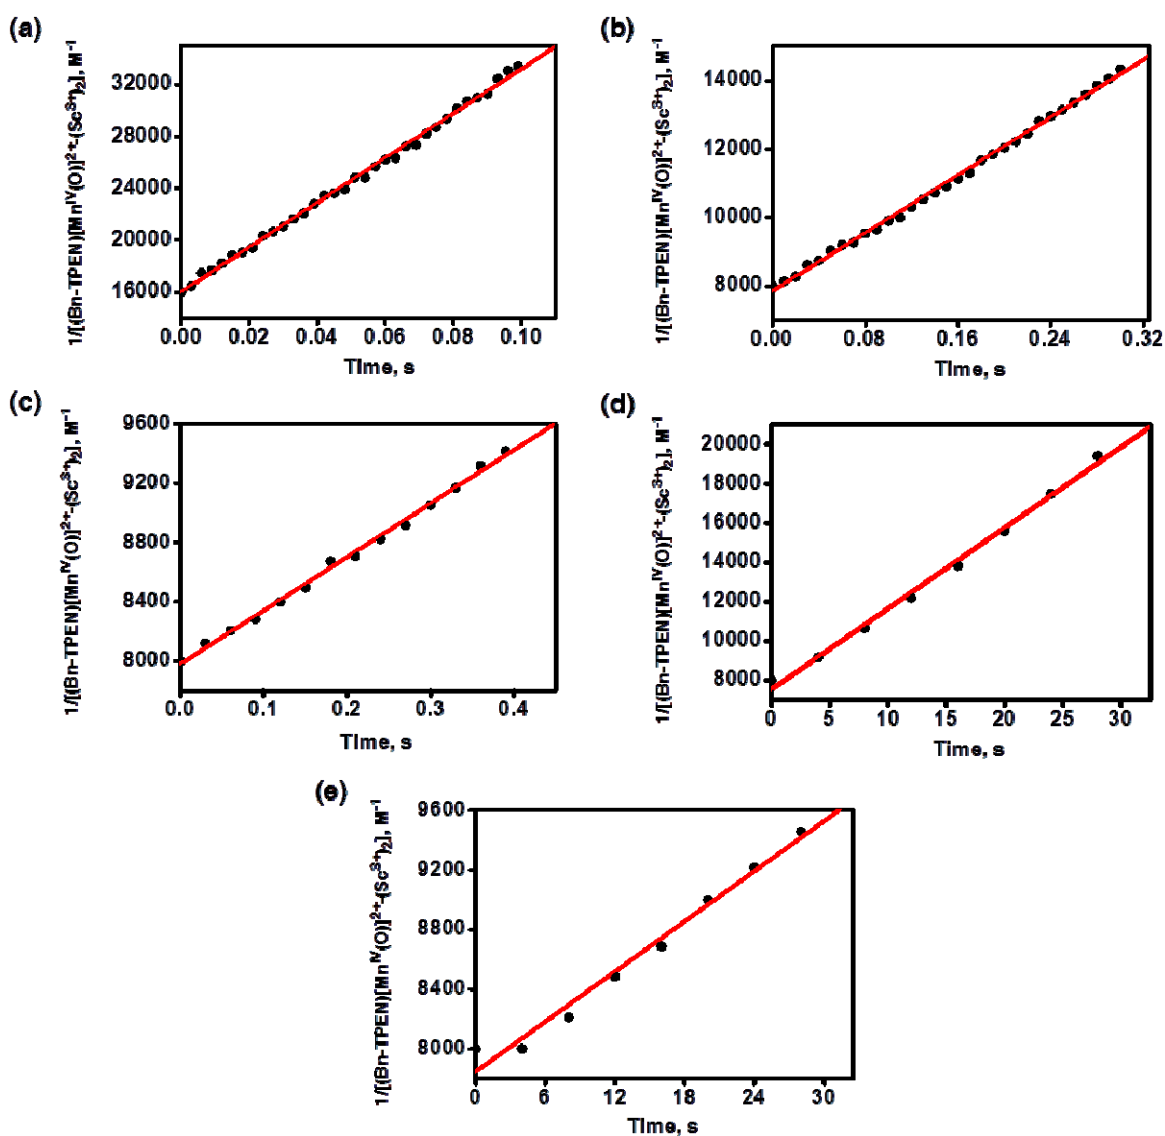

**Figure S7.** Second-order-plots of  $1/[(\text{Bn-TPEN})\text{Mn}^{\text{IV}}(\text{O})]^{2+}\text{-(Sc}^{3+})_2]$  vs time for electron transfer from one-electron reductants ( $1.25 \times 10^{-5}$  M; (a)  $[\text{Fe}^{\text{II}}(\text{Me}_2\text{-bpy})_3]^{2+}$ , (b)  $[\text{Fe}^{\text{II}}(\text{Ph}_2\text{-phen})_3]^{2+}$ , (c)  $[\text{Fe}^{\text{II}}(\text{bpy})_3]^{2+}$ , (d)  $[\text{Fe}^{\text{II}}(5\text{-Cl-phen})_3]^{2+}$ , and (e)  $[\text{Ru}^{\text{II}}(\text{bpy})_3]^{2+}$ ) to  $[(\text{Bn-TPEN})\text{Mn}^{\text{IV}}(\text{O})]^{2+}\text{-(Sc}^{3+})_2$  ( $1.25 \times 10^{-5}$  M) in  $\text{CF}_3\text{CH}_2\text{OH}/\text{CH}_3\text{CN}$  (v/v = 1:1) at 273 K.

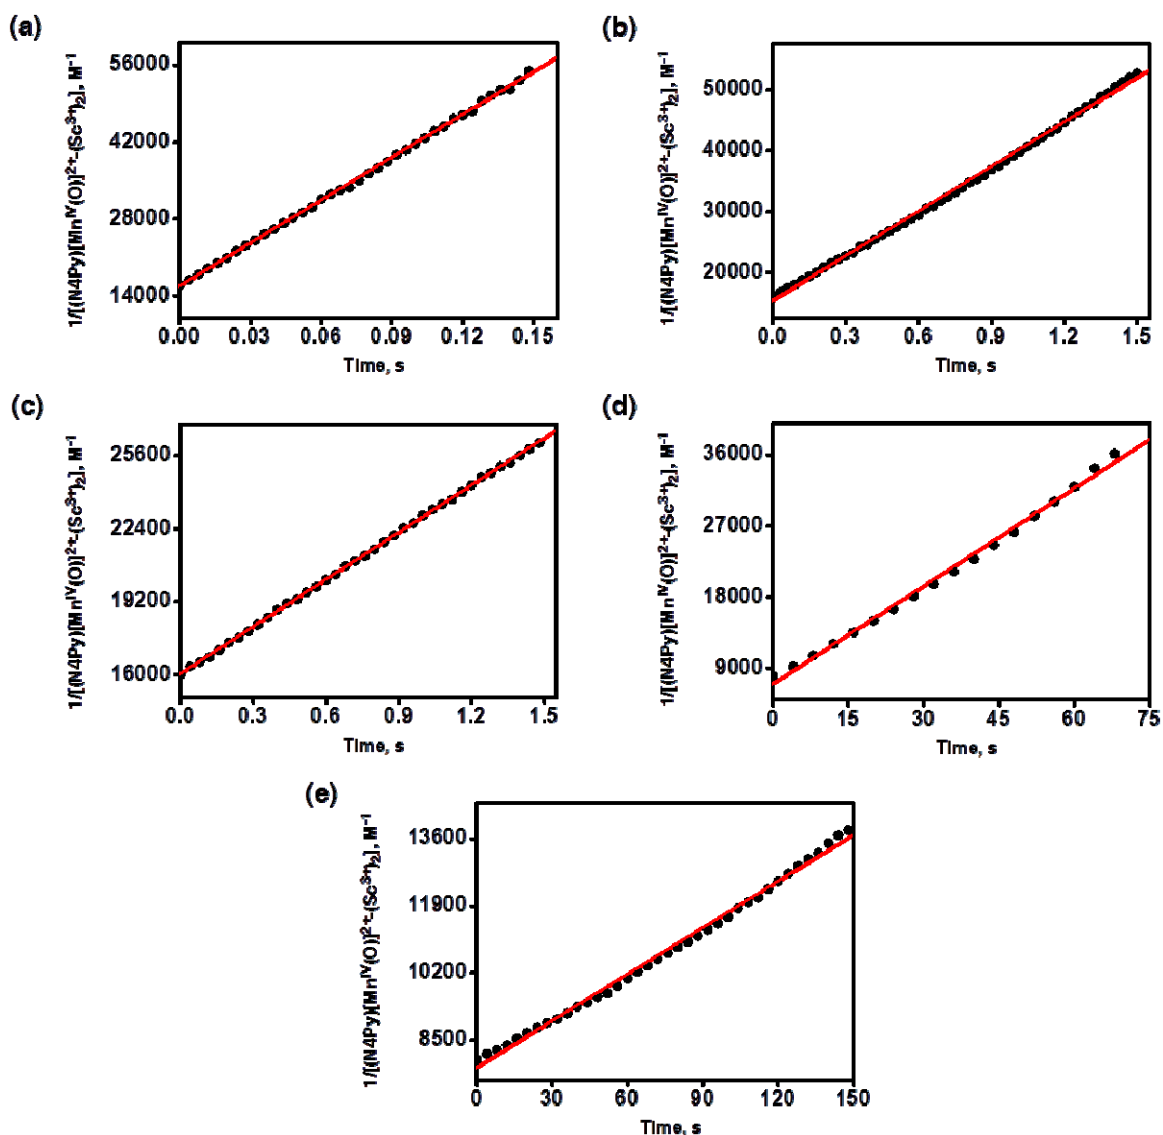

**Figure S8.** Second-order-plots of  $1/[(\text{N4Py})\text{Mn}^{\text{IV}}(\text{O})]^{2+} \cdot (\text{Sc}^{3+})_2$  vs time for electron transfer from one-electron reductants ( $1.25 \times 10^{-5}$  M); (a)  $[\text{Fe}^{\text{II}}(\text{Me}_2\text{-bpy})_3]^{2+}$ , (b)  $[\text{Fe}^{\text{II}}(\text{Ph}_2\text{-phen})_3]^{2+}$ , (c)  $[\text{Fe}^{\text{II}}(\text{bpy})_3]^{2+}$ , (d)  $[\text{Fe}^{\text{II}}(5\text{-Cl-phen})_3]^{2+}$ , and (e)  $[\text{Ru}^{\text{II}}(\text{bpy})_3]^{2+}$  to  $[(\text{N4Py})\text{Mn}^{\text{IV}}(\text{O})]^{2+} \cdot (\text{Sc}^{3+})_2$  ( $1.25 \times 10^{-5}$  M) in  $\text{CF}_3\text{CH}_2\text{OH}/\text{CH}_3\text{CN}$  (v/v = 1:1) at 273 K.

## DFT Calculated Coordinates

The coordinates are given in xyz-file format and (charge/multiplicity) is given in the comment field.

```
63
(BnTPEN)MnO from ref 41a (2/4)
Mn 7.53277 10.19064 3.40733
N 8.36706 11.96077 2.98090
N 6.52409 10.90759 5.00706
N 5.89003 11.19833 2.41873
N 6.39951 8.45918 3.08135
N 8.55303 9.33636 1.79415
C 9.44562 12.47468 3.62055
H 9.84321 11.88280 4.43331
C 9.99867 13.69052 3.22371
H 10.85943 14.08488 3.74737
C 9.42674 14.37724 2.14653
H 9.83986 15.32363 1.81914
C 8.30846 13.83969 1.49510
H 7.84291 14.35975 0.66754
C 7.78878 12.62258 1.92930
C 6.58468 11.94017 1.31379
H 5.91933 12.66831 0.83760
H 6.89034 11.22040 0.54794
C 5.25675 12.17819 3.37271
H 4.19520 12.30768 3.14128
H 5.72902 13.15661 3.23708
C 5.46913 11.74137 4.79211
C 6.49871 12.21190 5.85649
H 3.85529 12.86246 5.66153
C 5.03698 11.84089 7.16069
H 4.44926 12.19781 7.99788
C 6.14397 11.00921 7.37215
H 6.44009 10.71073 8.36931
C 6.86873 10.55633 6.27543
H 7.73283 9.91226 6.36018
C 4.89170 10.15140 1.98897
H 4.42080 10.43248 1.04059
H 4.10395 10.13111 2.74463
C 5.54505 8.78259 1.86224
H 4.78463 8.00644 1.73198
H 6.19431 8.75066 0.98712
C 7.41789 7.40763 2.72475
H 6.92700 6.51654 2.32414
H 7.93910 7.13434 3.64698
C 8.39766 7.98203 1.74612
C 9.13636 7.19599 0.86272
H 8.97821 6.12505 0.83909
C 10.07198 7.80573 0.02248
H 10.65840 7.21074 -0.66693
C 10.23531 9.19275 0.08392
H 10.94798 9.70515 -0.54894
C 9.46259 9.92854 0.97845
H 9.57534 10.99811 1.05041
C 5.57071 8.01836 4.29377
H 4.87215 8.82708 4.51038
H 6.27929 7.95329 5.12175
C 4.82031 6.71206 4.12711
C 3.49098 6.70364 3.66441
H 2.99077 7.63989 3.43472
C 2.79182 5.49955 3.52223
H 1.76743 5.51070 3.16539
C 3.40966 4.28682 3.85086
C 2.86739 3.35328 3.74395
C 4.72492 4.28411 4.33264
H 5.20306 3.34939 4.60570
C 5.42354 5.48809 4.47314
H 6.43561 5.47575 4.86666
O 8.70688 9.54045 4.41067

Mn -0.46899 -0.12280 0.76650
N -1.63046 -1.68010 1.29869
N -0.93398 -0.28933 -1.18709
N -2.38476 0.75229 0.77987
N 0.21109 1.86202 0.73771
N 0.11745 0.12893 2.74668
C -1.33229 -2.98802 1.09853
H -0.42843 -3.21467 0.55423
C -2.17381 -3.99044 1.57580
H -1.90992 -5.02598 1.41068
C -3.33555 -3.63580 2.26850
H -4.00019 -4.40037 2.65090
C -3.64806 -2.28108 2.45035
H -4.55587 -1.98077 2.95768
C -2.78374 -1.31346 1.95064
C -3.02446 0.17448 2.01995
H -4.09271 0.40984 2.04560
H -2.56091 0.62578 2.90119
C -3.16150 0.29865 -0.44157
H -3.89631 1.06133 -0.71221
H -3.71922 -0.60774 -0.19087
C -2.21585 -0.00213 -1.55908
C -2.60576 -0.07349 -2.89455
H -3.62420 0.17123 -3.16775
C -1.67453 -0.47300 -3.85815
H -1.96388 -0.53803 -4.89978
C -0.37029 -0.79108 -3.46119
H 0.37795 -1.11994 -4.16917
C -0.02516 -0.68636 -2.11932
H 0.96553 -0.91396 -1.76228
C -2.25222 2.26301 0.76590
H -3.08104 2.71383 1.31988
H -2.34130 2.58134 -0.27349
C -0.92150 2.68241 1.34935
H -0.73208 3.74341 1.16351
H -0.89885 2.52945 2.42827
C 1.39281 1.89426 1.67235
H 1.64590 2.93029 1.91340
H 2.24755 1.44906 1.15817
C 1.06019 1.10805 2.90218
C 1.69477 1.31322 4.12446
H 2.42380 2.10770 4.21919
C 1.38204 0.48548 5.20713
H 1.86877 0.62945 6.16368
C 0.43672 -0.52937 5.03407
H 0.17309 -1.20010 5.84068
C -0.17643 -0.68701 3.79456
H -0.89017 -1.47772 3.63769
C 0.61358 2.34358 -0.67209
H -0.27548 2.25796 -1.29602
H 1.35214 1.62137 -1.02423
C 1.16095 3.75433 -0.73157
C 0.30172 4.83578 -1.00505
H -0.75560 4.65925 -1.17877
C 0.80169 6.13977 -1.08637
H 0.12786 6.96220 -1.30049
C 2.16938 6.37837 -0.90400
H 2.55848 7.38878 -0.96945
C 3.03607 5.30743 -0.65166
H 4.09883 5.48450 -0.52671
C 2.53717 4.00308 -0.57003
H 3.22436 3.18256 -0.39276
O 1.06720 -0.91501 0.50492
O 2.40501 -2.65156 -3.35010
S 2.97283 -3.56093 -2.34591
C 1.70561 -4.91636 -2.12522
F 1.49384 -5.55778 -3.32694
O 2.94217 -2.95465 -0.94080

Sc 2.69239 -1.94889 0.76500
O 3.04149 -4.45674 4.13313
S 1.88278 -4.28315 3.25130
C 1.67218 -5.91166 2.35927
F 0.66519 -5.82189 1.41517
O 2.18966 -3.38385 2.04900
O 4.15148 -0.81113 1.53113
S 5.52241 -0.36954 2.05813
O 6.57991 -1.34145 1.76133
O 5.43618 0.20865 3.40341
C 5.82835 1.07227 0.91117
F 5.79927 0.66846 -0.40702
O 4.23889 -4.24176 -2.63259
O 0.57149 -3.98235 3.83981
F 0.50075 -4.38691 -1.69580
F 2.13042 -5.84316 -1.19826
F 2.83833 -6.27592 1.72237
F 1.33501 -6.89677 3.26327
F 7.05973 1.63067 1.17517
F 4.86105 2.04847 1.08935

H -2.55536 -4.06334 -0.83772
C -1.74340 -2.26194 -0.01877
H -1.91382 -1.68414 -0.91138
C 0.40506 0.71239 4.01675
H 0.09236 1.74928 3.89734
H 1.39575 0.59466 3.57608
C 0.42986 0.32493 5.47978
C -0.45886 0.91434 6.39909
H -1.16654 1.66967 6.07030
C -0.41719 0.56185 7.75265
H -1.10679 1.02482 8.45017
C 0.52032 -0.37437 8.20574
H 0.55358 -0.64554 9.25553
C 1.42750 -0.94536 7.30388
H 2.17138 -1.65296 7.65414
C 1.38646 -0.59594 5.94982
H 2.11590 -1.01838 5.26510
O 1.20109 -0.45410 0.82759
Sc 3.11438 -1.01096 -4.94919
O 3.96096 0.67298 -6.33131
S 2.62944 1.37146 -6.47240
C 2.78023 2.97253 -5.50761
F 3.28379 2.73006 -4.25045
O 4.38314 -0.21550 -3.55239
S 4.83839 0.03202 -2.13288
C 6.48875 -0.85234 -2.10414
F 7.31869 -0.30373 -3.05200
O 2.45680 -2.34937 -3.59556
S 2.18761 -3.36956 -2.51348
C 0.48801 -3.98307 -2.99484
F 0.55237 -4.55552 -4.24353
O 2.98000 -2.17837 -6.50498
S 2.91906 -3.32343 -7.53815
O 1.75277 -3.19156 -8.41436
O 1.71142 -0.50773 -5.58932
O 1.94648 -2.69274 -1.20241
Sc 2.77988 -1.48935 0.37031
O 4.19429 -4.39361 3.06985
S 2.81767 -4.22977 2.58978
C 2.51620 -5.67843 1.44676
F 1.29546 -5.56030 0.80951
O 4.00700 -0.76216 -1.17981
O 2.66290 -3.07460 1.60229
O 4.04934 -0.54099 1.65999
S 5.09574 -0.59158 2.77459
O 6.22788 -1.47311 2.46328
O 4.48659 -0.66160 4.11116
C 5.77896 1.14023 2.63849
F 6.30880 1.37289 1.38668
O 3.08605 -4.51630 -2.51661
O 1.71796 -4.26092 3.56552
O 5.07202 1.43044 -1.80029
O 2.13915 1.73464 -7.79341
C 4.40465 -2.86104 -8.57586
F 4.58684 -3.80524 -9.56305
S 2.32351 -4.62026 -6.93367
F 7.05987 -0.71015 -0.86200
F 6.31543 -2.19084 -2.37234
F -0.41208 -2.94162 -3.02342
O 0.06441 -4.92267 -2.08560
F 3.50383 -5.75569 0.48566
F 2.51740 -6.85135 2.17356
F 6.77716 1.31677 3.57548
F 4.79216 2.08142 2.87693
F 3.62500 3.82654 -6.17526
F 1.54080 3.55587 -5.39215
F 5.54125 -2.81253 -7.79441
F 4.22328 -1.62963 -9.16766
```

88

Mn(IV)-O-Sc(3+) (2/4)
